# Supplementary material for: Global burden of smoking-related cancers from 1990 to 2021: insights from the Global Burden of Disease study
Source: Research Square preprint supplement (doi:10.21203/rs.3.rs-6861637/v1), 2025-07-07
Supplement: Supplementary file 1 [file 3ba543f6054f6383dc55488b.docx]

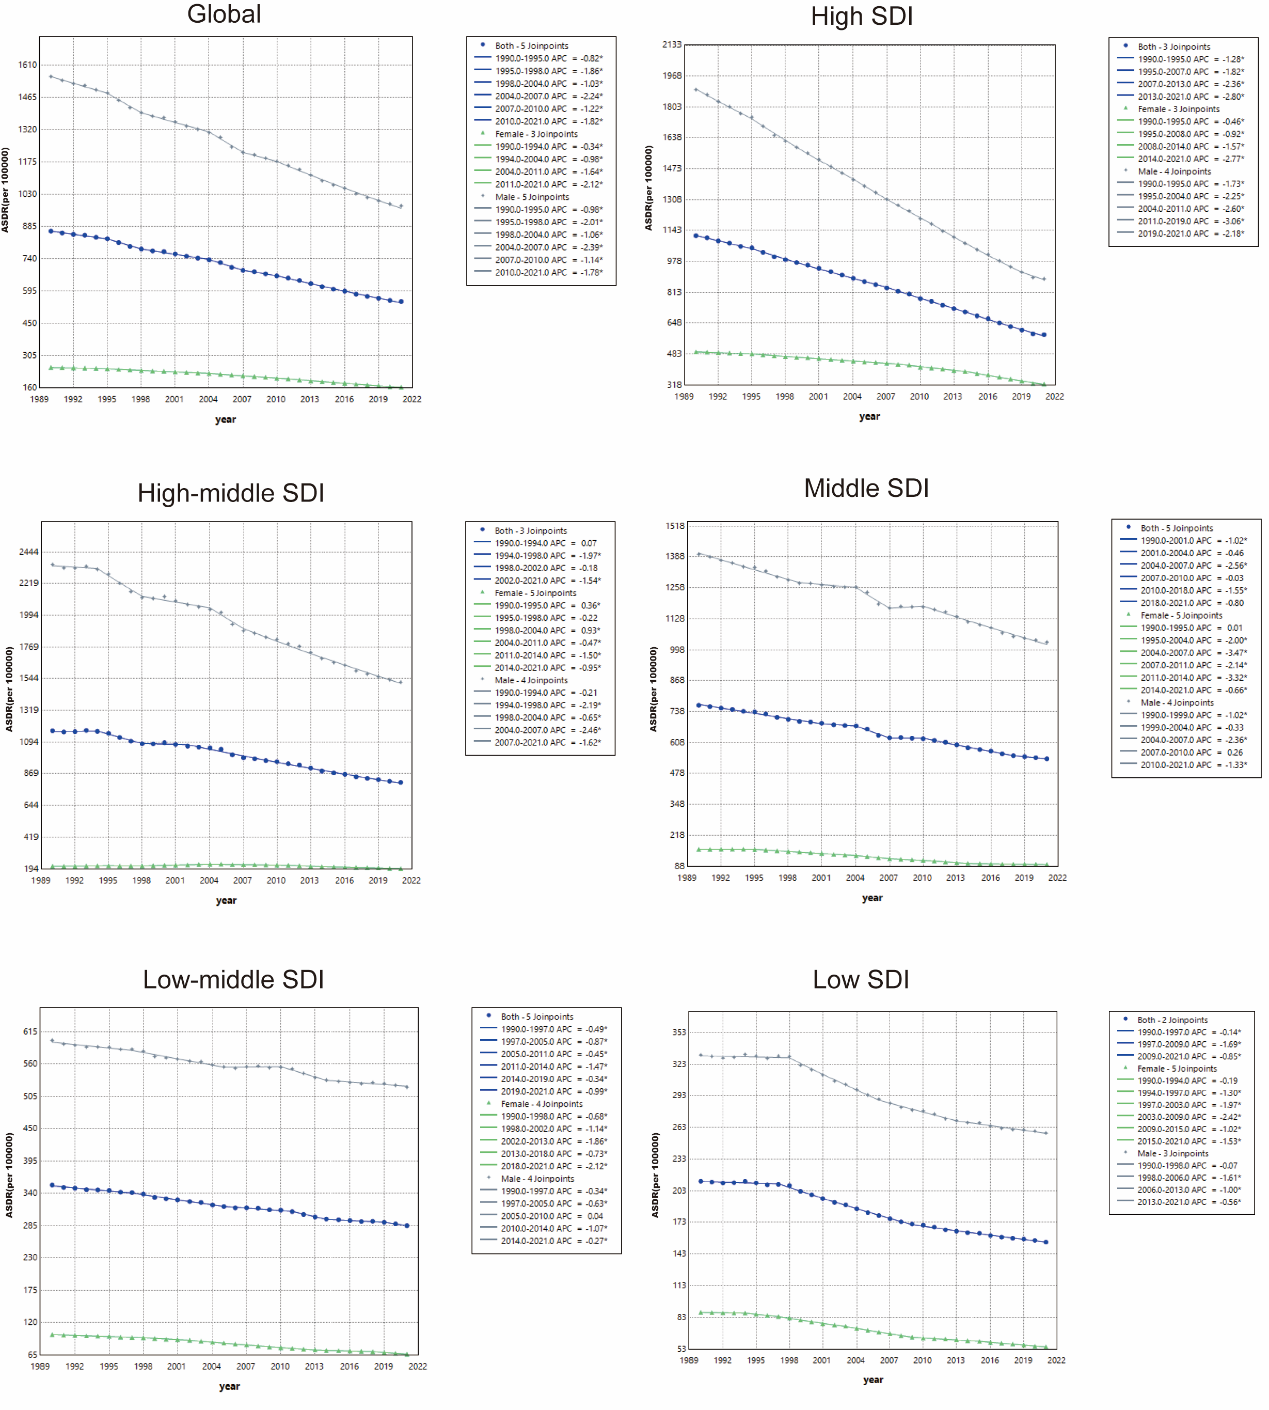


Figure S1: The APC of ASDR for smoking-related cancers from 1990 to 2021 in global and 5 SDI regions. APC, annual percent change; ASDR, age-standardized disability-adjusted life year rate; SDI, socio-demographic index


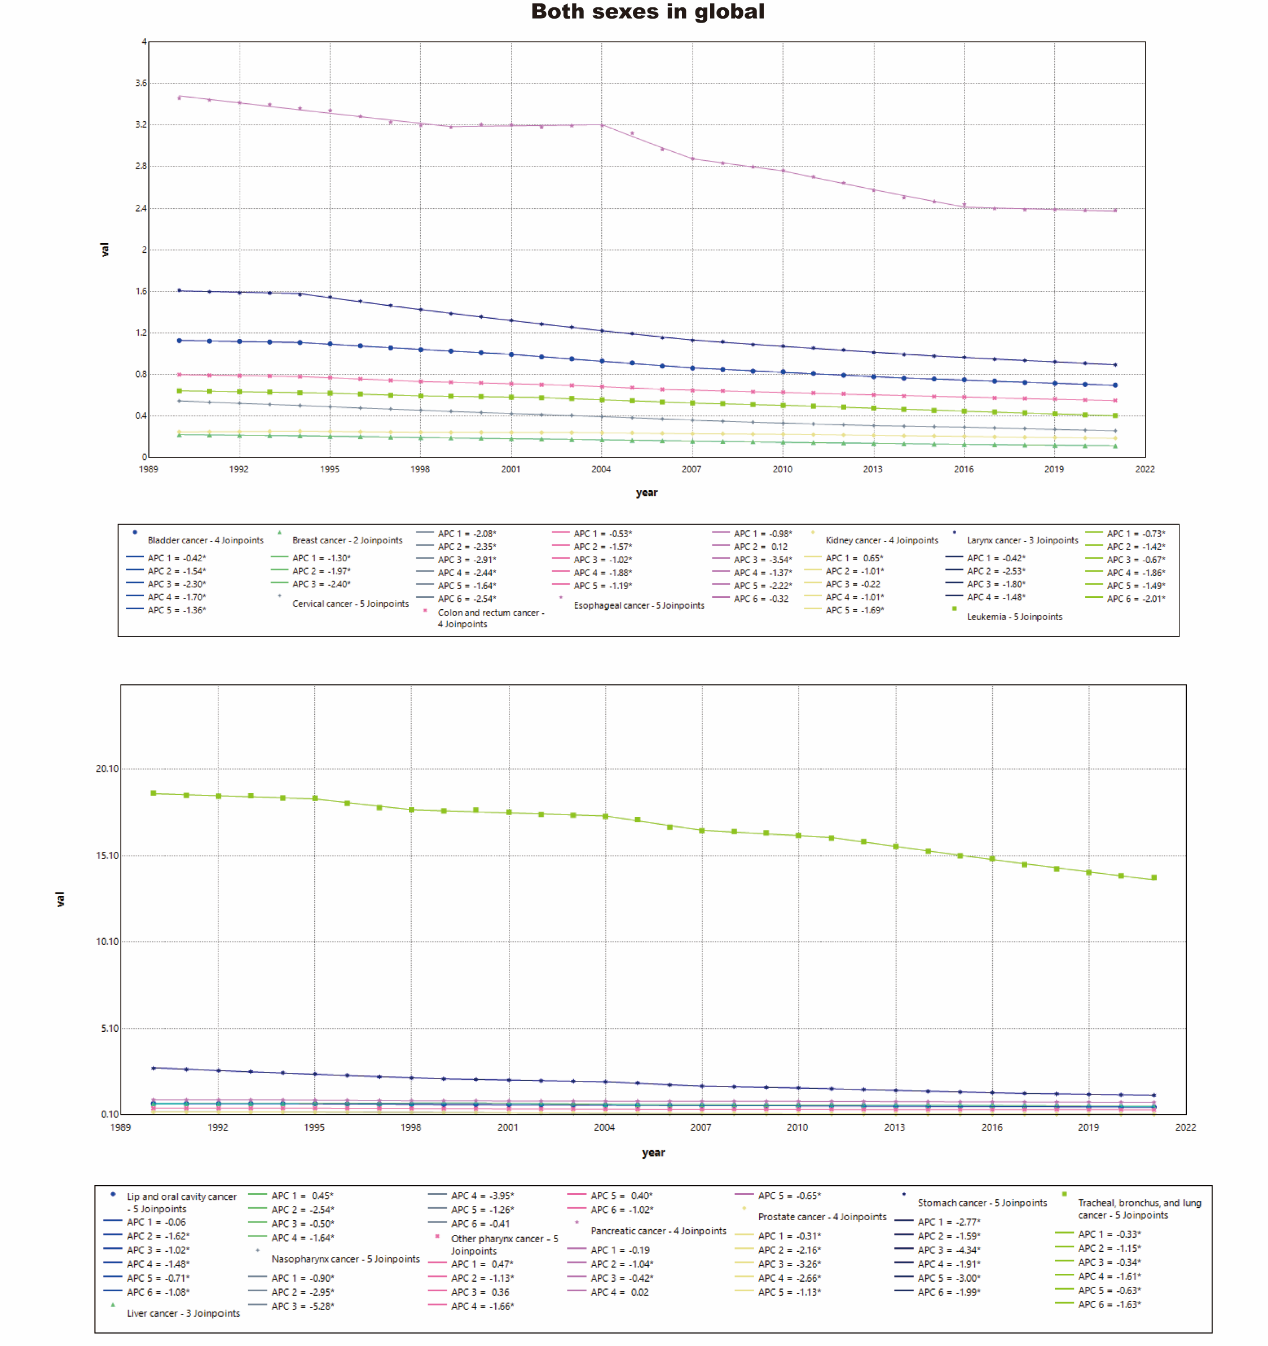


Figure S2: The APC of ASMR for 16 types of smoking-related cancers from 1990 to 2021 in both sexes. APC, annual percent change; ASMR, age-standardized mortality rate.

**
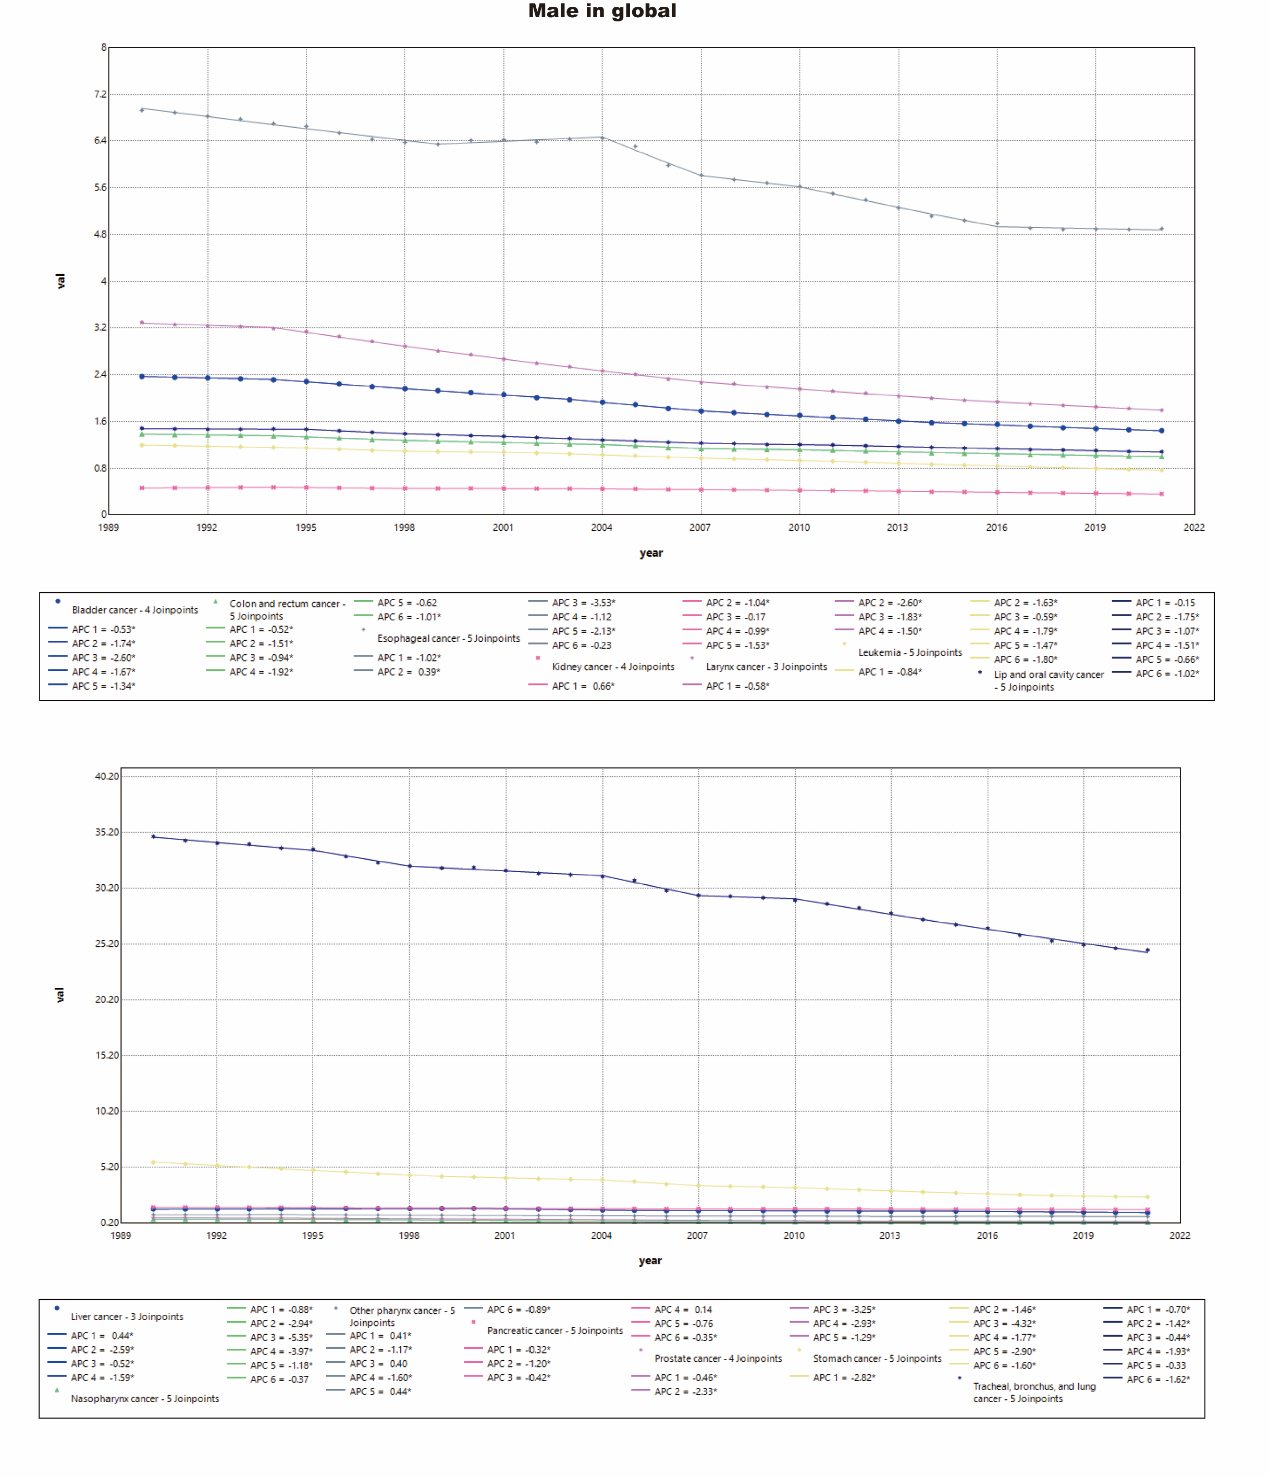
**

Figure S3: The APC of ASMR for 16 types of smoking-related cancers from 1990 to 2021 in global males. APC, annual percent change; ASMR, age-standardized mortality rate.

**
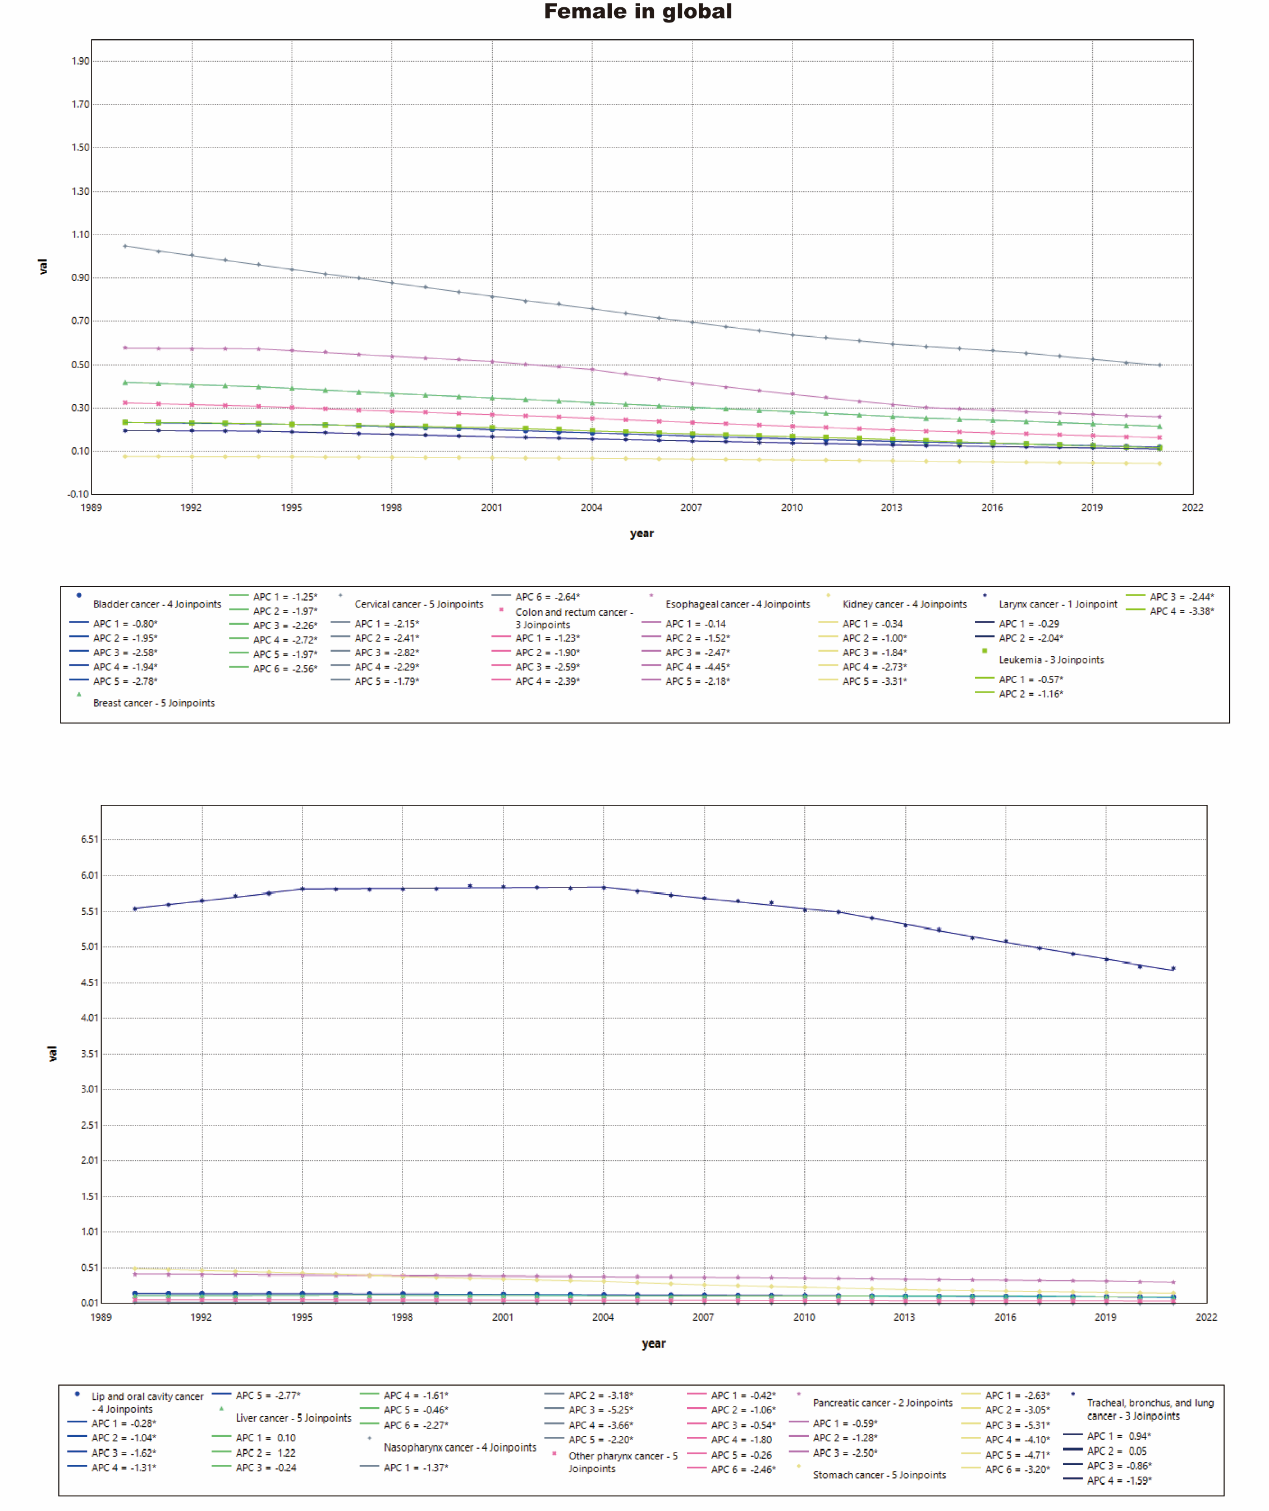
**

Figure S4: The APC of ASMR for 16 types of smoking-related cancers from 1990 to 2021 in global females. APC, annual percent change; ASMR, age-standardized mortality rate.

**
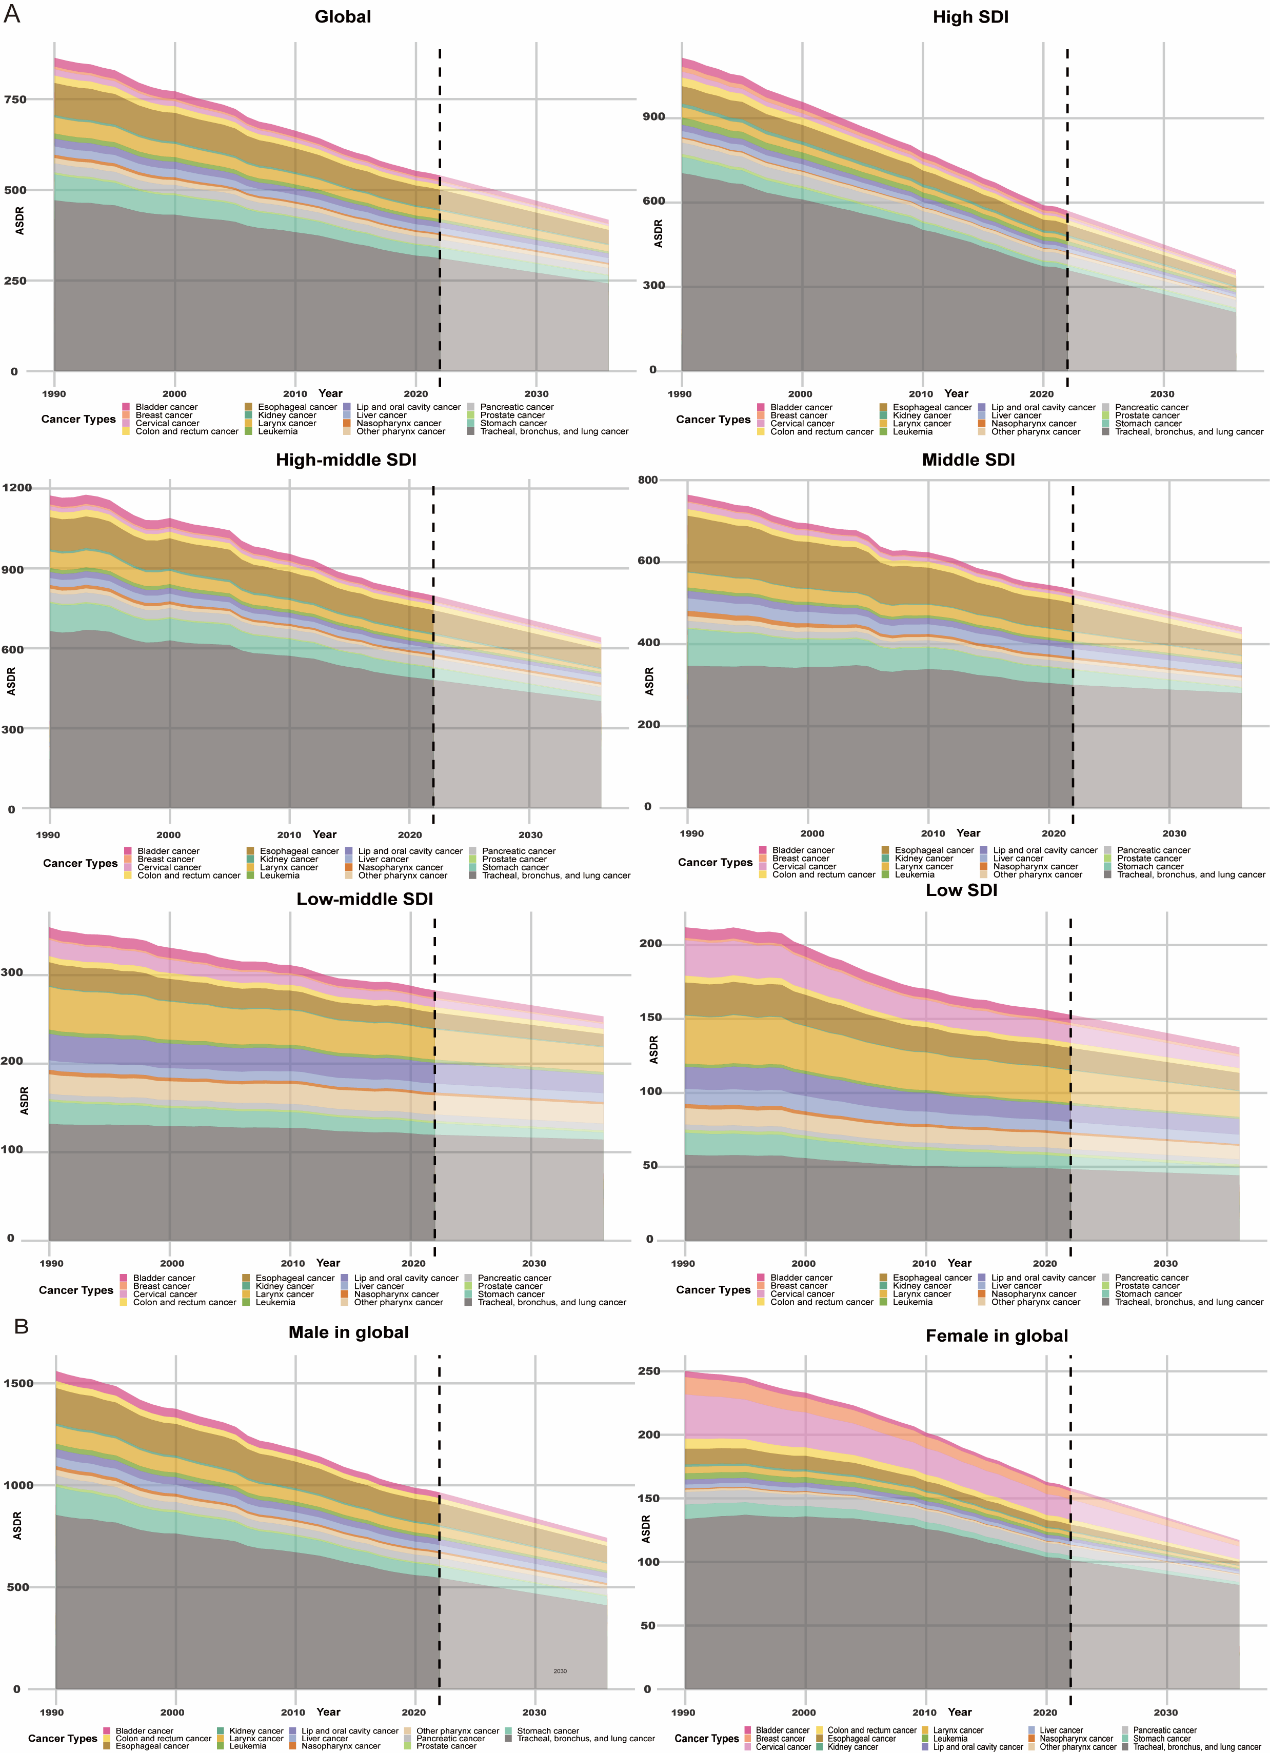
**

Figure S5: The trend prediction of ASDR for smoking-related tumors over the next 15 years. (A) Global and 5 SDI regions (B) Males and Females in global. The dashed vertical line indicates 2022 (the first forecast year). ASDR, age-standardized disability-adjusted life year rate; SDI, socio-demographic index

| **Table S1 Burden of neoplasms attributable to smoking in 204 countries and regions from 1990 to 2021** | | | | | | | | |
| --- | --- | --- | --- | --- | --- | --- | --- | --- |
| **Regions** | **Deaths**  **(95%UI)** | | **ASMR/10^5**  **(95%UI)** | | **DALYs**  **(95%UI)** | | **ASDR/10^5**  **(95%UI)** | |
| **1990** | **2021** | **1990** | **2021** | **1990** | **2021** | **1990** | **2021** |
| **Afghanistan** | 555  (339,  862) | 855 (550,1245) | 8.17 (5.03,12.55) | 9.16 (5.92,13.58) | 14814 (8709,22710) | 25593 (15932,37851) | 202.16 (121.27,311.37) | 226.64 (143.72,331.71) |
| **Albania** | 690  (568,  830) | 1248 (913,1633) | 34.5 (28.33,41.75) | 27.9 (20.27,36.55) | 17892 (14777,21420) | 28533 (21033,37283) | 833.9 (687.73,1001.67) | 651.12 (478.35,851.17) |
| **Algeria** | 1299  (1027,  1615) | 2738 (2040,3597) | 12.31 (9.78,15.19) | 8.64 (6.52,11.44) | 33320 (26383,41286) | 68183 (51078,89991) | 271.89 (215.06,334.43) | 188.44 (140.72,248.11) |
| **American Samoa** | 5 (4,6) | 10 (8,13) | 24.81 (20.08,29.64) | 20.98 (16.48,26.82) | 153 (124,185) | 279 (218,363) | 622.64 (505.62,751.55) | 538.7 (420.81,696.72) |
| **Andorra** | 28 (20,  38) | 37 (25,51) | 48.43 (34.75,66) | 24.09 (15.97,33.16) | 705 (500,973) | 886 (570,1229) | 1192.31 (846.78,1642.97) | 581.1 (373.29,805.16) |
| **Angola** | 544  (379,  778) | 1298 (936,1747) | 13.83 (9.74,19.72) | 10.91 (7.82,14.5) | 16475 (11351,23801) | 39208 (28056,53620) | 369.74 (258.37,529.09) | 286.35 (206.25,385) |
| **Antigua and Barbuda** | 6 (5,8) | 10 (8,12) | 11.51 (8.86,14.26) | 9.27 (7.13,11.58) | 145 (111,180) | 246 (190,304) | 288.32 (219.62,356.52) | 219.56 (169.27,271.86) |
| **Argentina** | 11440  (9822,  13129) | 11697 (9679,13747) | 34.88 (29.88,40.04) | 21.07 (17.45,24.79) | 321965 (276179,367056) | 299672 (248800,350169) | 981.87 (842.13,1119.55) | 554.4 (459.96,646.43) |
| **Armenia** | 1201  (1078,  1314) | 1377 (1183,1578) | 41.62 (37.31,45.73) | 31.07 (26.59,35.69) | 35750 (32112,38984) | 34070 (29201,39150) | 1177.94 (1054.59,1285.52) | 774.25 (661.97,890.77) |
| **Australia** | 6322  (5419,  7249) | 6663 (5363,8105) | 31.78 (27.26,36.49) | 14.73 (12.06,17.84) | 157289 (135203,178408) | 149615 (122749,180367) | 807.77 (694.16,916.18) | 357.2 (293.78,429) |
| **Austria** | 3727  (3212,  4269) | 4005 (3312,4689) | 32.4 (28,36.92) | 22.91 (19.12,26.6) | 93021 (80628,105908) | 93188 (78443,107593) | 862.1 (747.98,978.29) | 573.33 (482.68,659.59) |
| **Azerbaijan** | 1387  (1119,  1675) | 2010 (1464,2612) | 26.29 (21.17,31.81) | 19 (13.91,24.72) | 42016 (33920,50878) | 57538 (41754,75451) | 756.63 (609.43,915.76) | 495.53 (360.46,648.1) |
| **Bahrain** | 57 (47,68) | 141 (109,183) | 39.01 (31.7,46.83) | 19.93 (15.75,25.52) | 1529 (1247,1833) | 3909 (3009,5141) | 867.12 (709.89,1039.12) | 415.11 (325.28,534.61) |
| **Bangladesh** | 7792  (6101,  9584) | 13698 (9958,18297) | 17.03 (13.43,20.86) | 10.15 (7.45,13.46) | 216957 (168576,268601) | 353214 (251330,476689) | 443.93 (346.09,548.18) | 247.77 (177.75,333.12) |
| **Barbados** | 34 (26,42) | 41 (29,56) | 11.3 (8.75,14.02) | 7.89 (5.5,10.69) | 745 (576,931) | 904 (627,1242) | 270.52 (210.85,336.33) | 177.63 (122.76,243.9) |
| **Belarus** | 5249  (4601,  5904) | 4735 (3770,5857) | 39.58 (34.64,44.54) | 29.17 (23.24,36.09) | 151918 (133998,170199) | 128654 (101944,159735) | 1150.45 (1013.57,1291.85) | 811.92 (642.01,1008.33) |
| **Belgium** | 8565  (7502,  9623) | 6545 (5396,7688) | 55.69 (48.69,62.48) | 28.56 (23.82,33.23) | 202871 (180156,227007) | 145025 (122339,167558) | 1386.54 (1230.95,1545.69) | 692.92 (586.72,796.8) |
| **Belize** | 9 (8,11) | 28 (22,35) | 9.98 (8.27,11.88) | 9.47 (7.36,11.99) | 234 (194,278) | 745 (579,940) | 251.78 (209.18,298.95) | 235.18 (182.52,296.39) |
| **Benin** | 104 (70,  144) | 164 (112,226) | 5.27 (3.59,7.3) | 3.29 (2.26,4.49) | 2791 (1834,3898) | 4495 (3012,6258) | 135.85 (89.81,188.81) | 82.42 (55.74,113.6) |
| **Bermuda** | 19 (15,  22) | 23 (18,29) | 29.84 (23.77,36.19) | 16.55 (12.63,21.18) | 464 (374,563) | 511 (393,659) | 729.87 (587.22,886.8) | 395.18 (304.14,508.89) |
| **Bhutan** | 18 (11,  26) | 37 (25,53) | 7.69 (4.92,10.73) | 6.24 (4.22,8.99) | 538 (325,761) | 894 (591,1339) | 199.35 (123.12,281.36) | 145.27 (96.94,217.83) |
| **Bolivarian Republic of Venezuela** | 1767  (1441,  2092) | 3540 (2490,4704) | 18.58 (15.11,21.95) | 11.76 (8.32,15.56) | 49184 (39555,58926) | 90972 (63100,121627) | 479.79 (388.1,569.09) | 291.77 (203.35,389.63) |
| **Bosnia and Herzegovina** | 1716  (1503,  1959) | 2532 (1952,3234) | 39.98 (34.99,45.95) | 40.13 (30.94,51.29) | 49764 (43382,56694) | 62468 (48229,80000) | 1084.12 (945.86,1236.91) | 1028.02 (792.01,1316.83) |
| **Botswana** | 114  (83  ,154) | 227 (167,300) | 20.64 (15,27.85) | 16.06 (11.89,21.21) | 3207 (2299,4397) | 6269 (4552,8386) | 529.08 (383.23,720.78) | 394.91 (289.79,524.01) |
| **Brazil** | 25495  (21461,  29623) | 40322 (33386,48066) | 28.98 (24.35,33.81) | 16 (13.21,19.1) | 712563 (601049,824419) | 1012138 (840392,1203605) | 746.79 (630.51,865.29) | 393.59 (326.74,468.52) |
| **Brunei Darussalam** | 42 (33,  52) | 69 (52,86) | 44.81 (35.46,55.46) | 21.47 (16.23,27.2) | 1104 (863,1378) | 1859 (1413,2344) | 1049.99 (815.3,1305.64) | 494.2 (376.36,616.43) |
| **Bulgaria** | 4639  (3909,  5410) | 4831 (3828,5907) | 36.78 (30.86,43) | 36.58 (28.99,44.58) | 138379 (116862,160826) | 131507 (104022,160771) | 1116.42 (941.41,1300.94) | 1071.04 (848.03,1311.56) |
| **Burkina Faso** | 165 (96,  263) | 297 (182,445) | 3.68 (2.16,5.83) | 3.13 (1.95,4.64) | 5010 (2877,8084) | 8890 (5356,13409) | 104.41 (60.42,168.13) | 85.27 (52.3,127.68) |
| **Burundi** | 241 (166,  333) | 216 (144,317) | 10.32 (7.18,14.08) | 4.38 (2.94,6.33) | 7090 (4763,9876) | 6487 (4287,9681) | 285.04 (193.77,393.75) | 116.12 (77.51,171.29) |
| **Cambodia** | 1270  (959,  1674) | 3088 (2263,3954) | 29.59 (22.23,38.91) | 26.17 (19.3,33.36) | 34745 (26292,46049) | 80615 (58586,105841) | 732.93 (553.46,965.51) | 617.43 (454.24,801.97) |
| **Cameroon** | 247  (174,  348) | 605 (376,871) | 5.42 (3.85,7.57) | 4.74 (3.01,6.82) | 7448 (5153,10738) | 18065 (11023,26154) | 147.79 (103.77,209.43) | 125.98 (78.34,181.26) |
| **Canada** | 16220  (14206,  18145) | 17870 (14788,20938) | 49.68 (43.61,55.5) | 23.83 (19.84,27.9) | 397742 (351738,442587) | 373348 (314392,434579) | 1243.44 (1101.76,1382.2) | 530.72 (447.19,618.1) |
| **Central African Republic** | 127 (84,  189) | 161 (101,257) | 10.55 (7.01,15.81) | 6.8 (4.33,10.75) | 3868 (2532,5754) | 5112 (3153,8187) | 291.14 (192.41,434.74) | 188.14 (117.83,298.82) |
| **Chad** | 135 (87,  206) | 294 (190,432) | 4.82 (3.1,7.33) | 5.33 (3.48,7.73) | 3564 (2239,5421) | 8123 (5128,11969) | 121.93 (76.94,185.9) | 131.05 (84.43,192.48) |
| **Chile** | 2103  (1727,  2491) | 2666 (2149,3193) | 20.51 (16.8,24.3) | 10.41 (8.4,12.47) | 61762 (50764,72815) | 70255 (56921,83645) | 582.16 (479.44,686.78) | 280.03 (226.69,333.36) |
| **China** | 387209  (312266,  468245) | 858635 (664550,1089038) | 47.82 (39.04,57.43) | 40.59 (31.53,51.56) | 10702712 (8538908,12977607) | 20210685 (15465064,25924995) | 1196.8 (962.65,1446.1) | 925.17 (711.98,1183.45) |
| **Colombia** | 2718  (2263,  3241) | 3259 (2446,4195) | 15.75 (13.12,18.73) | 5.91 (4.43,7.62) | 74948 (61801,89711) | 79568 (59861,102969) | 402.03 (334.07,479.17) | 143.76 (108.08,186.51) |
| **Commonwealth of the Bahamas** | 23 (18,  29) | 49 (34,63) | 15.09 (11.43,19.17) | 11.93 (8.42,15.53) | 667 (512,836) | 1337 (933,1749) | 410.68 (313.13,517.16) | 305.25 (213.12,397.52) |
| **Comoros** | 20 (14,  27) | 35 (24,49) | 10.22 (7.16,13.74) | 7.52 (5.21,10.48) | 546 (372,767) | 910 (612,1295) | 257.73 (179.41,357.74) | 177.52 (120.75,250.78) |
| **Congo** | 120 (84,  164) | 247 (178,333) | 11.28 (8.05,15.3) | 9.62 (7.09,12.69) | 3420 (2344,4710) | 7129 (5001,9663) | 294.28 (204.75,402.94) | 238.02 (171.12,318.75) |
| **Cook Islands** | 3 (3,4) | 5 (4,7) | 27.8 (21.27,34.6) | 19.85 (15.1,25.74) | 87 (66,110) | 125 (94,162) | 671.76 (511.25,838.59) | 481.35 (360.35,624.15) |
| **Costa Rica** | 293 (237,  355) | 467 (347,597) | 17.3 (14,20.98) | 8.51 (6.31,10.89) | 7126 (5785,8613) | 10956 (8068,14018) | 404.37 (329.74,488.17) | 198.31 (145.88,253.47) |
| **Croatia** | 3487  (3033,  3983) | 3394 (2750,4014) | 56.05 (48.36,64.37) | 38.22 (30.92,45.23) | 95605 (83022,108293) | 78350 (63644,92378) | 1483.74 (1286.35,1688.68) | 955.06 (774.77,1127.44) |
| **Cuba** | 3745  (3245,  4259) | 6075 (4925,7352) | 36.7 (31.75,41.68) | 30.71 (24.94,37.18) | 92054 (79919,104588) | 145747 (119237,175863) | 900.63 (782.63,1021.92) | 753.55 (616.85,909.83) |
| **Cyprus** | 220  (176,  270) | 445 (351,535) | 29.51 (23.57,36.12) | 21.08 (16.64,25.38) | 5195 (4185,6327) | 10105 (7945,12170) | 650.98 (524.61,790.4) | 491.29 (387.68,592.12) |
| **Czech Republic** | 7395  (6306,  8409) | 6328 (5116,7600) | 53.67 (45.71,61) | 29.15 (23.64,35.1) | 198846 (169780,225809) | 145470 (117760,174884) | 1482.75 (1262.83,1683.08) | 718.84 (581.78,866.02) |
| **Democratic People's Republic of Korea** | 4350  (3058,  5754) | 7882 (5426,10828) | 26.2 (18.61,34.2) | 23.29 (16.09,31.97) | 129650 (89936,174806) | 222837 (152798,309211) | 712.78 (498.01,947.51) | 639.91 (439.39,886.17) |
| **Democratic Republic of the Congo** | 836  (553,  1210) | 1444 (943,2210) | 5.23 (3.5,7.57) | 3.77 (2.46,5.74) | 24803 (16345,35994) | 44104 (28713,68242) | 139.88 (92.42,202.14) | 102.51 (66.99,156.87) |
| **Denmark** | 5045  (4456,  5634) | 4460 (3648,5196) | 63.09 (55.86,70.5) | 35.81 (29.51,41.56) | 117368 (103824,130626) | 89657 (74760,103296) | 1571.94 (1390.6,1748.28) | 782.12 (655.65,898.06) |
| **Djibouti** | 17 (12,  25) | 78 (52,113) | 13.05 (9.09,18.41) | 13.2 (9.01,18.45) | 519 (352,757) | 2260 (1473,3287) | 332.12 (227.06,477.48) | 317.73 (211.28,453.99) |
| **Dominica** | 9 (7,11) | 11 (8,14) | 14.95 (11.7,18.19) | 12.74 (9.74,16.82) | 215 (169,261) | 277 (208,368) | 369.23 (290.97,447.01) | 317.28 (239.21,422.21) |
| **Dominican Republic** | 534  (418,  674) | 1511 (1115,2042) | 15.54 (12.2,19.52) | 15.36 (11.34,20.79) | 13778 (10766,17709) | 36464 (26881,49231) | 362.27 (284.56,461.82) | 361.06 (265.98,486.77) |
| **Ecuador** | 521  (424,  637) | 877 (635,1168) | 10.28 (8.34,12.55) | 5.47 (3.97,7.28) | 13246 (10782,16162) | 20274 (14527,27317) | 244.84 (199.39,298.61) | 123.01 (88.31,165.2) |
| **Egypt** | 2780  (2142,  3389) | 10183 (7653,13214) | 10.7 (8.28,13.22) | 17.47 (13.22,22.42) | 82507 (63712,100993) | 283160 (211793,366763) | 272.96 (210.38,332.05) | 413.18 (310.7,536.54) |
| **El Salvador** | 153  (115,  193) | 334 (241,446) | 5.17 (3.87,6.54) | 5.47 (3.95,7.32) | 4256 (3207,5390) | 8878 (6349,11986) | 138.55 (104.49,174.96) | 147.6 (105.73,199.3) |
| **Equatorial Guinea** | 16 (11,  24) | 39 (24,55) | 8.18 (5.43,11.94) | 7.8 (4.93,11.09) | 491 (318,719) | 1135 (707,1615) | 224.23 (146.23,328.01) | 199.2 (124.84,281.07) |
| **Eritrea** | 79 (53,  115) | 131 (85,195) | 5.97 (4.02,8.67) | 4.33 (2.88,6.4) | 2708 (1802,3900) | 4301 (2760,6505) | 178.42 (120.06,258.2) | 122.65 (80.18,182.91) |
| **Estonia** | 857  (755,  964) | 638 (521,764) | 41.44 (36.36,46.63) | 24.88 (20.45,29.56) | 24511 (21582,27565) | 15243 (12537,18117) | 1198.42 (1053.4,1347.54) | 642.82 (527.58,760.69) |
| **Ethiopia** | 947 (689,1302) | 953 (692,1257) | 4.6 (3.34,6.29) | 2.32 (1.68,3.06) | 27912 (20141,38460) | 25971 (18853,34659) | 124.68 (90.59,171.31) | 56.7 (41.42,75.1) |
| **Federated States of Micronesia** | 13 (9,17) | 20 (13,27) | 25.93 (19.16,34.89) | 25.58 (17.72,34.99) | 367 (265,497) | 597 (405,827) | 707.3 (514.6,957.67) | 694.15 (475.19,954.48) |
| **Fiji** | 46 (33,  59) | 69 (48,95) | 12.64 (9.29,16.11) | 8.7 (6.21,11.98) | 1440 (1036,1848) | 2010 (1387,2855) | 343.55 (248.56,439.33) | 232.96 (162.99,326.16) |
| **Finland** | 1922  (1648,  2221) | 1897 (1509,2263) | 26.98 (23.17,31.18) | 15.12 (12.18,17.93) | 47975 (41526,54894) | 41380 (33477,49044) | 698.75 (606.42,799.26) | 368.06 (298.56,432.23) |
| **France** | 34133  (29219,  39175) | 35048 (28601,41077) | 42.81 (36.71,48.82) | 26.67 (22.07,30.99) | 860243 (743509,976859) | 814937 (678333,946080) | 1145.28 (993.74,1296.08) | 693.49 (581.96,802.01) |
| **Gabon** | 53 (36  ,72) | 98 (68,135) | 9.18 (6.16,12.39) | 9.24 (6.42,12.63) | 1456 (985,1977) | 2826 (1932,3916) | 243.09 (164.28,330.46) | 240.48 (164.87,331.37) |
| **Georgia** | 1851  (1588,  2112) | 1803 (1519,2098) | 28.46 (24.4,32.41) | 30.52 (25.58,35.59) | 54614 (46628,62336) | 46476 (38975,54412) | 835.19 (711.46,952.92) | 816.37 (681.45,954.77) |
| **Germany** | 49386  (42547,  56401) | 49131 (40463,57544) | 39.53 (34.21,44.96) | 26.29 (21.95,30.46) | 1237273 (1077600,1402501) | 1100562 (922974,1280477) | 1043.59 (909.73,1180.44) | 650 (547.75,751.19) |
| **Ghana** | 193  (130,  269) | 540 (373,764) | 3.51 (2.41,4.79) | 3.69 (2.52,5.15) | 5251 (3420,7555) | 14083 (9635,20235) | 80.91 (54.06,113.69) | 82.1 (56.78,117.1) |
| **Greece** | 7613  (6772,  8472) | 9283 (7975,10631) | 49.53 (44.04,55.16) | 39.87 (34.74,45.06) | 179376 (161335,198348) | 196280 (171746,221976) | 1194.55 (1074.99,1321.42) | 958.44 (843.65,1079.1) |
| **Greenland** | 41 (35,  47) | 45 (36,56) | 119.13 (101.88,137.84) | 62.96 (49.85,77.96) | 1214 (1034,1412) | 1224 (981,1492) | 3136.97 (2689.56,3628.69) | 1575.51 (1262.45,1940.31) |
| **Grenada** | 9 (7,11) | 11 (8,13) | 12.51 (9.6,15.94) | 9.12 (6.79,11.45) | 218 (167,278) | 288 (217,359) | 340.13 (261.46,432.69) | 234.43 (175.38,292.17) |
| **Guam** | 17 (14,20) | 33 (26,42) | 21.97 (17.9,26.78) | 15.51 (12.15,19.65) | 480 (394,576) | 930 (733,1170) | 561.99 (461.59,680.43) | 440.55 (347.75,554.56) |
| **Guatemala** | 225 (171,  287) | 460 (330,615) | 7.31 (5.59,9.42) | 4.29 (3.07,5.71) | 6001 (4581,7726) | 11590 (8227,15722) | 167.02 (126.69,213.79) | 102.44 (73.22,138.75) |
| **Guinea** | 197 (135,  276) | 351 (228,499) | 6.03 (4.16,8.41) | 6.36 (4.2,8.97) | 5392 (3610,7546) | 9724 (6196,14021) | 156.18 (105.23,217.65) | 161.72 (104.45,231.99) |
| **Guinea-Bissau** | 19 (12,  29) | 38 (25,54) | 4.71 (2.94,7.04) | 5.08 (3.44,7.07) | 578 (353,877) | 1194 (772,1697) | 130.72 (80.59,197.27) | 139.09 (91.91,195.42) |
| **Guyana** | 32 (24,  41) | 42 (28,59) | 8.47 (6.4,10.85) | 6.44 (4.34,9.02) | 929 (703,1188) | 1230 (816,1727) | 227.42 (172.28,289.57) | 174.33 (115.82,244.36) |
| **Haiti** | 366  (252,  505) | 444 (278,644) | 10.86 (7.46,15.04) | 6.17 (3.88,9.07) | 11394 (7733,15582) | 13215 (8279,19270) | 309.88 (211.56,424.65) | 161.51 (101.54,234.87) |
| **Honduras** | 198  (154,  247) | 778 (596,1042) | 9.96 (7.79,12.34) | 12.72 (9.64,17.03) | 5414 (4243,6809) | 19743 (14978,27019) | 251.12 (196.01,314.52) | 301.57 (229.67,407.32) |
| **Hungary** | 8197  (7048,  9346) | 7778 (6323,9293) | 56.22 (48.41,64.07) | 42.16 (34.4,50.31) | 234190 (203334,267837) | 200444 (163669,238129) | 1653.55 (1433.44,1889.18) | 1157.89 (947.78,1375.41) |
| **Iceland** | 109 (92  ,125) | 128 (103,156) | 38.18 (32.27,43.8) | 21.85 (17.72,26.45) | 2558 (2182,2926) | 2840 (2313,3417) | 934.96 (801.37,1068.68) | 517.57 (423.92,620.6) |
| **India** | 49336  (38825,  60247) | 97462 (76679,119805) | 10.57 (8.26,12.94) | 8.24 (6.49,10.16) | 1469950 (1153950,1790582) | 2618926 (2046664,3224131) | 283.62 (223.21,346.48) | 208.82 (164.19,256.88) |
| **Indonesia** | 12753  (9705,  15662) | 40398 (28145,53419) | 13.65 (10.28,16.59) | 17.79 (12.4,23.42) | 357498 (274897,443555) | 1079749 (753605,1440179) | 339.67 (259.41,418.17) | 419.11 (292.34,554.03) |
| **Iraq** | 1535  (1207,  1947) | 4418 (3195,5706) | 20.17 (15.9,25.57) | 20.56 (14.99,26.49) | 40543 (31622,51522) | 114129 (81296,149711) | 503.97 (393,638.91) | 466.83 (336.7,604.52) |
| **Ireland** | 2125  (1836,  2401) | 1790 (1479,2125) | 50.88 (43.92,57.66) | 22.11 (18.37,26.14) | 48168 (41733,54180) | 38429 (32205,45182) | 1188.96 (1029.38,1337.81) | 496.65 (416.59,583.78) |
| **Islamic Republic of Iran** | 3102  (2499,  3856) | 7694 (6396,9204) | 12.34 (9.87,15.35) | 10.33 (8.5,12.43) | 87026 (70731,107252) | 197792 (165647,233143) | 305.33 (246.91,378.62) | 243.48 (203.76,287.93) |
| **Israel** | 1326  (1123,  1531) | 2046 (1688,2444) | 27.57 (23.35,31.85) | 16.51 (13.64,19.69) | 31962 (27418,36731) | 45434 (37931,53257) | 678.47 (583.85,777.31) | 388.29 (324.66,453.14) |
| **Italy** | 39621  (34648,  44431) | 32366 (26617,37751) | 44.38 (38.77,49.66) | 22.24 (18.59,25.65) | 974063 (855285,1082324) | 671046 (564545,775626) | 1135.43 (996.99,1259.93) | 518.82 (441.58,596.85) |
| **Jamaica** | 296 (244,  346) | 420 (301,584) | 16.84 (13.97,19.65) | 13.66 (9.78,18.96) | 7472 (6212,8711) | 10497 (7421,14771) | 441.84 (367.3,514.94) | 341.34 (241.5,480.08) |
| **Japan** | 57806  (49357,  66300) | 79348 (65145,93929) | 33.88 (28.92,38.92) | 20.11 (16.79,23.45) | 1367493 (1163498,1569894) | 1413127 (1173075,1653309) | 790.73 (672.31,907.8) | 433.99 (363.92,503.46) |
| **Jordan** | 235 (183  ,292) | 933 (694,1231) | 18.45 (14.38,22.91) | 13.3 (10.02,17.46) | 6790 (5250,8433) | 25888 (19140,34059) | 461.55 (360.08,573.81) | 315.56 (234.39,417.01) |
| **Kazakhstan** | 5810  (4918,  6697) | 2938 (2426,3507) | 43.52 (36.78,50.36) | 15.41 (12.76,18.34) | 177545 (151586,203839) | 84628 (69954,100880) | 1283.98 (1095.74,1480.04) | 424.67 (351.06,505.97) |
| **Kenya** | 366 (258,  481) | 1003 (717,1344) | 4.62 (3.21,6) | 4.44 (3.17,5.96) | 10149 (7109,13416) | 28678 (20445,38510) | 116.63 (82.54,153.66) | 113.21 (80.84,151.84) |
| **Kingdom of Eswatini** | 36 (24,52) | 64 (41,92) | 13.46 (9.11,18.95) | 11.94 (7.69,17.12) | 1013 (678,1438) | 1820 (1146,2654) | 335.02 (224.12,474.39) | 299.89 (191.39,431.48) |
| **Kiribati** | 11 (8,14) | 22 (15,30) | 28.81 (21.87,37.27) | 29.48 (20.75,40.14) | 336 (249,445) | 682 (473,942) | 801.15 (601.93,1050.82) | 806.55 (564.44,1106.88) |
| **Kuwait** | 86 (70,  103) | 221 (167,282) | 15.3 (12.44,18.18) | 8.8 (6.65,11.25) | 2538 (2061,3073) | 5942 (4486,7665) | 377.71 (306.49,453.2) | 191.18 (143.46,245.77) |
| **Kyrgyzstan** | 957  (813,  1106) | 735 (584,913) | 31.15 (26.47,36.07) | 14.87 (11.83,18.4) | 28760 (24364,33442) | 21382 (16875,26796) | 911.53 (767.92,1063.6) | 396.18 (313.89,493.22) |
| **Lao People's Democratic Republic** | 575  (395,  846) | 939 (679,1249) | 28 (19.36,41.12) | 21.72 (15.8,28.6) | 16000 (10869,23491) | 25005 (18031,33461) | 719.06 (490.91,1059.11) | 515.03 (372.8,686.01) |
| **Latvia** | 1409  (1229,  1594) | 967 (798,1144) | 38.95 (34,44.12) | 26.13 (21.65,30.84) | 40430 (35487,45522) | 24294 (20122,28649) | 1130.53 (991.87,1275.48) | 708.59 (587.63,834.35) |
| **Lebanon** | 656 (495,  824) | 1721 (1349,2177) | 31.06 (23.95,39.02) | 28.16 (22.07,35.58) | 17329 (12800,21822) | 37886 (29599,47374) | 759.05 (567.3,955.96) | 645.05 (504.86,807.75) |
| **Lesotho** | 130 (94,  173) | 321 (228,446) | 15.72 (11.43,21) | 29.54 (20.93,40.81) | 3353 (2426,4474) | 9276 (6414,12959) | 385.13 (279.48,511.6) | 789.54 (553.31,1107.59) |
| **Liberia** | 53 (32,  77) | 81 (47,120) | 4.65 (2.81,6.77) | 3.74 (2.18,5.54) | 1491 (882,2213) | 2511 (1414,3721) | 124.38 (73.56,184.21) | 100.61 (57.63,149.14) |
| **Libya** | 480 (373,  616) | 1347 (972,1799) | 26.57 (20.65,34.15) | 26.93 (19.55,35.75) | 12740 (9870,16346) | 37213 (26817,50345) | 649.68 (505.06,835.94) | 650.95 (467.68,873.23) |
| **Lithuania** | 1643  (1434,  1832) | 1437 (1189,1720) | 36.09 (31.44,40.25) | 26.35 (21.81,31.44) | 46113 (40496,51387) | 35628 (29463,42537) | 1019.29 (892.95,1136.88) | 705.65 (584.42,839.6) |
| **Luxembourg** | 257 (216,  299) | 259 (211,309) | 47.1 (39.73,54.89) | 24.51 (20.09,29.27) | 6416 (5430,7497) | 5955 (4877,7141) | 1214.86 (1028.53,1417.9) | 583.53 (478.75,697.82) |
| **Madagascar** | 332 (243,  429) | 346 (228,496) | 6.77 (4.96,8.7) | 3.23 (2.18,4.52) | 9608 (7092,12589) | 10619 (6968,15480) | 175.81 (129.47,227.86) | 80.81 (53.4,115.45) |
| **Malawi** | 268 (194,  349) | 622 (426,844) | 7.55 (5.49,9.84) | 8.78 (6.15,11.82) | 7277 (5308,9443) | 17306 (11653,23860) | 182.02 (133.21,236.2) | 218.46 (149.57,296.54) |
| **Malaysia** | 1727  (1389,  2151) | 4530 (3704,5455) | 19.61 (15.8,24.47) | 16.56 (13.51,19.86) | 45501 (36392,56241) | 114482 (93819,138497) | 476.3 (382.52,590.35) | 389.56 (318.42,471.78) |
| **Maldives** | 16  (12,  21) | 30 (22,37) | 20.91 (15.61,27.48) | 10.11 (7.6,12.42) | 432 (305,576) | 695 (507,884) | 472.34 (341.91,625.48) | 205.81 (151.7,260.32) |
| **Mali** | 186  (122,  260) | 508 (322,747) | 5 (3.28,6.95) | 6.33 (4.18,9.16) | 5224 (3344,7442) | 13824 (8428,20678) | 123.17 (79.65,172.39) | 148.78 (93.61,218.52) |
| **Malta** | 141  (120,  162) | 164 (132,197) | 32.63 (27.74,37.64) | 17.63 (14.44,21.01) | 3546 (3029,4056) | 3837 (3155,4550) | 821.65 (701.36,940.55) | 459.5 (380.36,543.34) |
| **Marshall Islands** | 3 (2,4) | 7 (4,10) | 17.89 (11.93,25.35) | 19.73 (12.52,28.22) | 82 (53,116) | 202 (124,297) | 466 (304.05,666.91) | 503.73 (312.47,729.15) |
| **Mauritania** | 79 (46,  124) | 116 (74,163) | 7.69 (4.62,12) | 5.36 (3.44,7.55) | 2365 (1346,3774) | 3280 (2062,4738) | 218.45 (126.04,344.14) | 139.45 (88.89,199.39) |
| **Mauritius** | 118  (102,  137) | 221 (188,259) | 16.67 (14.32,19.24) | 11.85 (10.05,13.87) | 3153 (2716,3631) | 5522 (4693,6440) | 412.32 (355.11,474.46) | 289.06 (245.17,337.15) |
| **Mexico** | 6472  (5391,  7574) | 6724 (5249,8358) | 16.59 (13.77,19.44) | 5.48 (4.26,6.82) | 161411 (133364,189647) | 158991 (122346,197862) | 372.98 (309.7,436.49) | 123.7 (95.8,153.78) |
| **Mongolia** | 395  (294,  508) | 769 (523,994) | 37.67 (27.84,48.38) | 32.9 (22.48,42.57) | 10785 (8054,13944) | 22582 (15433,29084) | 991.31 (738.66,1280.28) | 861.73 (587.38,1109.43) |
| **Montenegro** | 315  (268,  362) | 503 (401,624) | 49.13 (41.71,56.78) | 50.03 (39.9,61.99) | 9018 (7747,10337) | 13015 (10452,16126) | 1373.39 (1177.14,1572.7) | 1315.53 (1058.58,1630.53) |
| **Morocco** | 1631  (1298,  2034) | 3538 (2605,4551) | 11.58 (9.24,14.42) | 10.1 (7.45,12.88) | 44036 (34926,55629) | 94210 (69078,121455) | 298.13 (237.2,375.39) | 256.19 (188.16,329.11) |
| **Mozambique** | 393  (265,  550) | 767 (488,1124) | 6.98 (4.69,9.78) | 7.19 (4.67,10.51) | 10959 (7146,15528) | 22121 (13885,32314) | 171.7 (114.71,240.51) | 181 (115.06,264.79) |
| **Myanmar** | 6380  (4623,  8292) | 7046 (5159,9239) | 28.39 (20.7,36.69) | 15.18 (11.08,20.07) | 175206 (125240,231019) | 175649 (127496,230327) | 714.86 (516.6,937.35) | 348.5 (253.79,456.17) |
| **Namibia** | 53  (39,69) | 105 (73,142) | 8.77 (6.52,11.47) | 8.17 (5.71,10.87) | 1442 (1062,1882) | 2827 (1887,3856) | 212.73 (157.24,278.66) | 195.63 (133.81,265.44) |
| **Nepal** | 1395  (1002,  1831) | 2198 (1607,2843) | 15.23 (10.92,20.04) | 9.87 (7.33,12.71) | 40536 (28597,53475) | 55570 (39956,71937) | 394.5 (282.55,518.38) | 231.61 (166.69,298.9) |
| **Netherlands** | 11046  (9824,  12258) | 11155 (9341,12914) | 55.04 (48.96,61.1) | 30.61 (25.74,35.3) | 258704 (230417,285851) | 233152 (197517,266639) | 1340.78 (1194.82,1480.29) | 686.55 (582.69,783.22) |
| **New Zealand** | 1439  (1224  ,1645) | 1612 (1342,1930) | 36.29 (30.85,41.47) | 18.71 (15.65,22.29) | 35089 (29910,39929) | 35312 (29756,41661) | 908.11 (774.4,1032.37) | 433.24 (365.27,510.24) |
| **Nicaragua** | 95 (73,  118) | 215 (156,284) | 6.31 (4.92,7.84) | 4.49 (3.26,5.9) | 2677 (2026,3372) | 5722 (4098,7582) | 160.86 (123.73,200.38) | 111.5 (80.31,147.47) |
| **Niger** | 69 (42,  103) | 156 (99,227) | 2.67 (1.66,3.95) | 2.22 (1.45,3.24) | 1999 (1175,3097) | 4155 (2527,6103) | 65.71 (40.07,98.9) | 49.06 (31.06,71.35) |
| **Nigeria** | 701  (459,  996) | 1077 (675,1556) | 1.63 (1.07,2.28) | 1.19 (0.76,1.71) | 19585 (12813,28068) | 31170 (19127,45080) | 41.71 (27.3,59.33) | 30.36 (18.98,43.85) |
| **Northern Mariana Islands** | 6 (5,7) | 14 (11,17) | 36.84 (29.51,45.68) | 26.9 (21.19,32.97) | 184 (141,239) | 388 (308,482) | 908.96 (715.31,1143.45) | 665.42 (527.77,816.18) |
| **Norway** | 2022  (1729,  2325) | 1753 (1432,2088) | 30.1 (25.79,34.45) | 17.12 (14.15,20.26) | 46080 (39747,52677) | 36943 (31061,43159) | 750.38 (647.2,853.26) | 389.48 (330.29,452.98) |
| **Oman** | 43 (29,60) | 74 (51,100) | 6.66 (4.55,9.18) | 4.04 (2.83,5.44) | 1233 (831,1707) | 2125 (1471,2901) | 168.79 (113.38,231.4) | 94.63 (66.01,128.21) |
| **Pakistan** | 12828  (9820,  15586) | 22403 (16181,29557) | 23.57 (17.97,28.65) | 19.28 (13.97,25.31) | 336176 (257694,409843) | 617653 (442705,817262) | 580.05 (444,704.89) | 474.57 (342.53,627.22) |
| **Palestine** | 194  (144,  250) | 435 (345,537) | 23.97 (17.95,30.77) | 18.57 (14.87,22.97) | 4766 (3432,6177) | 11536 (9117,14342) | 546.19 (398.07,707.07) | 430.3 (342.23,532.49) |
| **Panama** | 186  (153,  224) | 266 (191,357) | 12.96 (10.63,15.61) | 6.02 (4.34,8.08) | 4566 (3751,5477) | 6019 (4335,8108) | 304.61 (250.66,364.65) | 136.6 (98.41,184.14) |
| **Papua New Guinea** | 226  (139,  346) | 561 (364,846) | 12.29 (7.7,18.98) | 10.92 (7.15,16.44) | 7003 (4227,10819) | 17353 (11330,26172) | 333.26 (205.14,513.61) | 289.98 (187.98,436.45) |
| **Paraguay** | 376  (294,  472) | 1066 (752,1441) | 17.46 (13.68,21.88) | 18.86 (13.31,25.34) | 9616 (7509,12060) | 25844 (18255,34796) | 422.41 (330.89,527.52) | 436.69 (308.66,588.35) |
| **Peru** | 838  (635,  1073) | 1698 (1191,2349) | 7.33 (5.57,9.44) | 5.13 (3.59,7.09) | 20997 (15541,26735) | 39702 (27954,55156) | 172.5 (129.07,220.15) | 117.53 (82.89,163.35) |
| **Philippines** | 5632  (4626,  6710) | 12484 (9657,15600) | 20.37 (16.69,24.22) | 15.5 (12.11,19.2) | 160063 (130980,191133) | 339586 (259123,429269) | 501.61 (411.57,597.98) | 385.85 (296.95,483.6) |
| **Plurinational State of Bolivia** | 430  (314,  551) | 821 (572,1162) | 13.82 (10.14,17.79) | 9.3 (6.5,13.14) | 11557 (8454,14848) | 20514 (14292,29494) | 345.88 (253.95,443.54) | 217.85 (151.8,312.72) |
| **Poland** | 23831  (21375,  26473) | 28521 (24170,32864) | 53.86 (48.27,59.95) | 39.38 (33.48,45.29) | 672379 (604412,741620) | 686412 (593347,787324) | 1529.08 (1374.81,1688.73) | 993.71 (858.67,1138.9) |
| **Portugal** | 3662  (3047,  4232) | 3966 (3328,4634) | 26.17 (21.76,30.25) | 17.94 (15.25,20.82) | 95013 (79932,109436) | 98172 (83535,114187) | 699.68 (589.83,807.17) | 491.1 (419.1,569.66) |
| **Principality of Monaco** | 36  (27,46) | 50 (40,64) | 54.05 (40.7,67.86) | 53.24 (42.44,67.21) | 822 (617,1033) | 1105 (883,1404) | 1388.52 (1047.16,1736) | 1323.72 (1049.45,1724.06) |
| **Puerto Rico** | 620  (487,  791) | 601 (436,810) | 17.11 (13.43,21.81) | 8.44 (6.15,11.35) | 14813 (11597,18867) | 13115 (9583,17727) | 409.72 (321.07,521.2) | 208.29 (150.8,283.45) |
| **Qatar** | 23 (17,30) | 96 (66,131) | 24.76 (18.74,31.81) | 11.55 (7.96,15.83) | 711 (536,924) | 3116 (2130,4319) | 576.53 (436.9,734.84) | 262.17 (181.2,357.8) |
| **Republic of Cabo Verde** | 16 (12,20) | 38 (26,50) | 7.09 (5.24,9.01) | 8.55 (6.06,11.47) | 400 (295,508) | 1001 (705,1351) | 184.3 (135.36,235.64) | 214.84 (151.47,287.79) |
| **Republic of Côte d'Ivoire** | 165  (115,  223) | 379 (250,543) | 4.22 (3.02,5.59) | 3.46 (2.29,4.83) | 4967 (3443,6850) | 11172 (7203,16302) | 109.16 (76.9,147.32) | 88.58 (58.35,127.27) |
| **Republic of Korea** | 13296  (10580,  15711) | 22978 (18422,27983) | 45.49 (36.19,53.92) | 24.19 (19.39,29.53) | 377570 (296701,450466) | 462291 (368823,562895) | 1153.03 (912.44,1367.99) | 487.85 (388.99,594.79) |
| **Republic of Moldova** | 1512  (1289,  1740) | 1411 (1194,1659) | 32.56 (27.68,37.45) | 23.37 (19.74,27.5) | 45581 (38948,52458) | 39696 (33582,46596) | 966.93 (823.94,1110.83) | 671.89 (567.47,788.86) |
| **Republic of Nauru** | 2 (1,2) | 2 (1,2) | 36.87 (21.42,50.48) | 31.07 (17.93,41.34) | 53 (32,72) | 58 (35,79) | 985.69 (590.73,1351.5) | 859.87 (518.65,1157.16) |
| **Republic of Niue** | 0 (0,0) | 0 (0,1) | 17.6 (13.02,22.53) | 19.08 (13.66,25.42) | 10 (7,13) | 11 (7,14) | 461.94 (338.27,600.13) | 480.35 (336.85,648.54) |
| **Republic of Palau** | 3 (2,4) | 6 (4,8) | 31.9 (24.01,42.67) | 25.13 (18.62,33.97) | 83 (61,111) | 160 (114,217) | 807.77 (599.19,1071.02) | 629.29 (453.94,847.16) |
| **Republic of San Marino** | 15 (12,18) | 12 (8,17) | 41.07 (33.27,50.02) | 16.53 (10.4,24.31) | 330 (267,402) | 262 (162,390) | 980.24 (793.31,1192.12) | 400.79 (242.08,599.78) |
| **Republic of the Gambia** | 21 (12,33) | 45 (24,71) | 5.73 (3.33,8.7) | 4.41 (2.4,6.83) | 664 (348,1038) | 1382 (710,2267) | 163.87 (89.97,254.3) | 123.59 (65.24,196.36) |
| **Romania** | 8505  (7367,  9619) | 11528 (9284,13687) | 29.38 (25.35,33.32) | 33.28 (26.93,39.51) | 262496 (227786,295385) | 310488 (250402,367795) | 908.16 (783.43,1023.54) | 952.86 (772.56,1132.86) |
| **Russian Federation** | 71671  (65043,  77770) | 61156 (51487,70043) | 38.12 (34.53,41.44) | 25.2 (21.19,28.86) | 2132477 (1941361,2311703) | 1654902 (1389529,1893750) | 1134.37 (1031.88,1230.19) | 701.21 (588.94,802.16) |
| **Rwanda** | 529  (367,  707) | 823 (564,1139) | 19.21 (13.38,25.43) | 14.23 (9.86,19.41) | 15123 (10248,20235) | 21996 (14848,30920) | 496.02 (340.94,663.32) | 332.17 (226.28,459.13) |
| **Saint Kitts and Nevis** | 4 (3,5) | 5 (4,7) | 10.65 (7.88,13.73) | 7.8 (5.61,10.26) | 95 (70,122) | 139 (100,181) | 271.72 (202.58,346.62) | 184.99 (133.51,242.05) |
| **Saint Lucia** | 14 (11,17) | 24 (18,32) | 16.43 (13.04,20.09) | 10.12 (7.32,13.26) | 364 (290,445) | 619 (450,815) | 418.42 (333.2,509.05) | 251.41 (182.62,330.51) |
| **Saint Vincent and the Grenadines** | 8 (6,9) | 13 (10,17) | 10.62 (8.3,13.22) | 9.17 (6.77,11.71) | 196 (153,243) | 343 (254,436) | 278.05 (217.02,346.04) | 234.83 (173.06,298.62) |
| **Samoa** | 11 (8,14) | 16 (12,21) | 12.9 (9.88,16.35) | 11.13 (8.28,14.44) | 307 (230,397) | 455 (332,601) | 337.79 (253.59,434.06) | 294.41 (213.23,387.25) |
| **Sao Tome and Principe** | 3 (2,4) | 6 (5,9) | 4.28 (3.17,5.55) | 6.01 (4.42,8) | 74 (54,97) | 177 (126,241) | 109.38 (80.62,142.86) | 148.73 (108.18,199.46) |
| **Saudi Arabia** | 363  (250,  500) | 1190 (857,1575) | 6.26 (4.42,8.62) | 6.15 (4.51,8.06) | 10695 (7267,14656) | 37965 (27031,50556) | 164.23 (113.08,226.5) | 156.42 (114.47,206.88) |
| **Senegal** | 198  (140,  262) | 363 (244,498) | 5.94 (4.2,7.86) | 4.59 (3.09,6.34) | 5861 (4139,7779) | 10367 (6940,14244) | 166.32 (117.75,220.8) | 122.46 (82.47,167.62) |
| **Serbia** | 5235  (4318,  6396) | 6727 (5360,8366) | 44.87 (37.07,54.93) | 41.86 (33.38,51.97) | 152274 (125965,183939) | 173730 (138459,215902) | 1244.67 (1029.87,1512.27) | 1146.27 (911.2,1415.06) |
| **Seychelles** | 18 (14,  21) | 27 (21,32) | 31.1 (25.14,37.13) | 23.44 (18.81,28.36) | 439 (352,522) | 691 (551,839) | 784.86 (628.91,934.11) | 562.67 (448.62,680.95) |
| **Sierra Leone** | 135  (87,  196) | 175 (116,247) | 6.61 (4.3,9.55) | 4.59 (3.1,6.44) | 3812 (2373,5629) | 5133 (3351,7330) | 178.36 (112.55,262.54) | 122.95 (80.97,174.32) |
| **Singapore** | 633  (528,  739) | 849 (684,1026) | 29.44 (24.46,34.32) | 9.87 (7.92,11.93) | 16595 (13745,19602) | 19058 (15618,22849) | 717.08 (596.98,840.68) | 216.21 (176.77,259.77) |
| **Slovakia** | 2872  (2444,  3328) | 2701 (2122,3343) | 47.93 (40.87,55.74) | 28.19 (22.21,34.85) | 80992 (69206,93848) | 69683 (54622,86081) | 1372.77 (1171.14,1588) | 753.84 (590.63,932.46) |
| **Slovenia** | 940  (803,  1072) | 1058 (836,1291) | 37.78 (32.25,43.11) | 24.8 (19.76,30.02) | 27074 (23260,30630) | 25721 (20494,31012) | 1093.23 (936.64,1237.56) | 643.53 (512.67,776.19) |
| **Socialist Republic of Viet Nam** | 9366  (7078,  12044) | 21825 (16269,27230) | 23.14 (17.54,29.65) | 21.31 (16.24,26.48) | 253367 (189614,327999) | 614431 (445545,778738) | 608.87 (456.13,787.97) | 563.71 (413.7,709.32) |
| **Solomon Islands** | 30 (18  ,43) | 71 (51,95) | 21.38 (14.31,30.63) | 19.72 (14.34,26.18) | 896 (527,1308) | 2219 (1590,2992) | 574.81 (356.29,836.16) | 546.55 (393.49,729.73) |
| **Somalia** | 209  (132,  311) | 378 (225,586) | 8.65 (5.57,12.84) | 6.06 (3.72,9.41) | 6661 (4129,10056) | 11838 (7000,18551) | 234.21 (148.65,348.11) | 163.59 (98.31,253.9) |
| **South Africa** | 4911  (3971,  5882) | 7884 (6434,9462) | 23.65 (19.1,28.51) | 16.67 (13.57,20.13) | 146213 (118806,174511) | 227964 (184567,274395) | 652.32 (529.96,777.57) | 451.92 (367.95,542.4) |
| **South Sudan** | 236  (158,  340) | 270 (170,385) | 9.28 (6.25,13.38) | 7.2 (4.68,10.2) | 6405 (4274,9370) | 7926 (4913,11316) | 239.44 (161.06,350.05) | 181.84 (114.5,258.97) |
| **Spain** | 22895  (19903,  25828) | 22849 (19486,26375) | 42.15 (36.72,47.6) | 24.56 (21.14,28.17) | 578900 (509020,650256) | 531598 (458123,610659) | 1114.51 (980.29,1250.33) | 623.57 (538.63,712.76) |
| **Sri Lanka** | 1102  (880,  1339) | 1649 (988,2346) | 11.06 (8.85,13.49) | 6.05 (3.68,8.56) | 28851 (23213,34979) | 41063 (24091,58603) | 259.21 (207.94,314.44) | 146.19 (86.47,208.67) |
| **Sudan** | 1011  (694,  1465) | 1860 (1189,2630) | 11.29 (7.79,16.38) | 10.3 (6.56,14.59) | 27285 (18750,39523) | 49400 (31106,71065) | 281.01 (194.19,406.38) | 240.84 (153.56,343.41) |
| **Suriname** | 40  (32,  49) | 78 (55,108) | 15.65 (12.52,19.16) | 12.03 (8.55,16.81) | 1123 (879,1375) | 2152 (1532,2991) | 414.55 (326.68,507.65) | 321.99 (228.81,446.49) |
| **Sweden** | 3715  (3076,  4402) | 3925 (3094,4799) | 24.73 (20.67,29.12) | 17.19 (13.62,21.03) | 82476 (68984,96693) | 75999 (60699,93183) | 603.73 (507.83,703.97) | 371.81 (299.85,454.95) |
| **Switzerland** | 3429  (2900,  3987) | 3766 (3130,4438) | 33.58 (28.56,38.86) | 20.38 (17.14,23.85) | 81823 (69904,94014) | 78271 (65975,91118) | 851.97 (731.44,974.67) | 465.32 (394.92,538.81) |
| **Syrian Arab Republic** | 762  (565,  983) | 1565 (1114,2124) | 15.25 (11.29,19.6) | 12.54 (9.07,16.77) | 21039 (15580,27045) | 41762 (29285,57622) | 378.16 (279.51,486.95) | 292.6 (208.02,398.27) |
| **Taiwan (Province of China)** | 5257  (4458,  5951) | 11356 (9476,13082) | 33.17 (28.25,37.58) | 26.7 (22.28,30.81) | 143806 (121006,164464) | 272220 (223768,315237) | 844.47 (712.39,964.98) | 658.63 (542.11,763.72) |
| **Tajikistan** | 638  (499,  786) | 496 (336,701) | 22.91 (17.95,28.2) | 8.68 (6.03,12.18) | 18374 (14544,22572) | 14327 (9670,20352) | 629.33 (494.95,772.06) | 218.95 (148.45,308.77) |
| **Thailand** | 12017  (9240,  14822) | 22766 (16594,31221) | 35.8 (27.73,43.93) | 20.77 (15.19,28.33) | 323898 (249262,398469) | 541809 (388124,763662) | 865.64 (667.27,1067.49) | 494.31 (355.64,692.94) |
| **The former Yugoslav Republic of Macedonia** | 776  (647,  907) | 1273 (987,1587) | 40.28 (33.45,47.1) | 37.57 (28.94,46.62) | 22144 (18638,25866) | 33583 (25933,42012) | 1099.07 (922.77,1280.03) | 972.67 (750.68,1216.8) |
| **Timor-Leste** | 32 (23,44) | 101 (72,137) | 12.87 (9.14,17.68) | 12.3 (8.82,16.66) | 944 (658,1280) | 2550 (1816,3469) | 311.86 (221.83,421.89) | 291.03 (208.18,395.17) |
| **Togo** | 96 (67,131) | 283 (184,387) | 8.2 (5.82,11.04) | 7.49 (4.93,10.21) | 2703 (1855,3731) | 8197 (5273,11409) | 205.76 (142.86,280.72) | 191.88 (124.8,262.29) |
| **Tokelau** | 0 (0,0) | 0 (0,0) | 18.79 (13.54,25.31) | 16.34 (12.1,21.66) | 7 (5,9) | 6 (4,8) | 474.79 (338.1,646.83) | 413.14 (297.81,556) |
| **Tonga** | 18 (13,22) | 23 (17,30) | 33.05 (25.41,41.32) | 29.56 (22.1,38.17) | 453 (344,573) | 571 (411,755) | 790.86 (603.58,991.87) | 703.69 (509.13,927.77) |
| **Trinidad and Tobago** | 115 (93,  141) | 185 (130,251) | 13.87 (11.24,17.09) | 9.38 (6.56,12.73) | 3060 (2475,3763) | 4870 (3410,6703) | 356.59 (288.95,436.98) | 247.32 (172.43,339.8) |
| **Tunisia** | 1164  (962,  1395) | 2653 (1787,3696) | 23.96 (19.87,28.75) | 19.91 (13.54,27.61) | 29638 (24344,35681) | 67133 (44849,94324) | 567.38 (468.31,682.86) | 483.52 (324.2,675.76) |
| **Turkey** | 18881  (14825,  23366) | 30059 (23176,38204) | 54.13 (42.58,66.58) | 31.61 (24.42,40.24) | 538523 (422396,668361) | 779611 (597657,990220) | 1431.67 (1123.08,1773.56) | 794.9 (610.52,1008.24) |
| **Turkmenistan** | 565  (478,  660) | 451 (322,605) | 28.57 (24.11,33.34) | 10.69 (7.66,14.31) | 16857 (14233,19629) | 13607 (9683,18360) | 805.87 (682.57,935.63) | 297.71 (212.18,399) |
| **Tuvalu** | 1 (1,2) | 2 (2,3) | 20.87 (14.8,28.58) | 19.72 (14.68,26.3) | 42 (30,58) | 57 (42,76) | 564.14 (402.36,771.25) | 513.9 (382.34,686.58) |
| **Uganda** | 433  (299,  583) | 844 (574,1170) | 6.93 (4.82,9.38) | 5.86 (4.07,8.15) | 12142 (8353,16562) | 24488 (16668,34229) | 177.5 (122.56,238.66) | 150.15 (102.41,207.82) |
| **Ukraine** | 29063  (25967,  32176) | 15306 (10076,21694) | 39.77 (35.39,44.04) | 20.13 (13.2,28.48) | 853331 (761049,942933) | 429485 (279804,608505) | 1185.71 (1055.58,1307.9) | 588.48 (380.88,833.92) |
| **United Arab Emirates** | 78  (55,  107) | 353 (245,485) | 18.66 (13.21,25.65) | 11.72 (8.01,16.2) | 2537 (1751,3471) | 11756 (8100,16295) | 465.21 (327.77,642.3) | 242.73 (167.52,335.97) |
| **United Kingdom of Great Britain and Northern Ireland** | 50134  (44096,  55567) | 37381 (30767,44006) | 54.56 (48.01,60.41) | 27.5 (22.87,32.25) | 1120279 (987408,1240912) | 744041 (621343,867244) | 1302.08 (1146.1,1442.82) | 599.35 (504.75,695.55) |
| **United Republic of Tanzania** | 1248  (891,  1646) | 1927 (1324,2667) | 11.63 (8.35,15.25) | 7.58 (5.31,10.32) | 36104 (25476,48028) | 56463 (38071,79295) | 306.06 (217.56,404.43) | 196.64 (133.81,273.08) |
| **United States of America** | 153623 (134602,  172685) | 154585 (128040,180052) | 48.91 (42.95,54.77) | 25.83 (21.49,30.05) | 3838636 (3365356,4281176) | 3467078 (2918174,4025678) | 1282.95 (1128.05,1426.09) | 608.27 (513.4,706.28) |
| **United States Virgin Islands** | 13  (9,17) | 16 (11,22) | 14.81 (10.69,19.34) | 8.58 (5.93,11.85) | 353 (253,470) | 372 (254,518) | 381.46 (274.76,506.81) | 215.72 (146.26,301.54) |
| **Uruguay** | 1807  (1567,  2027) | 1784 (1468,2047) | 46.57 (40.43,52.21) | 33.82 (28.13,38.69) | 48296 (42095,53940) | 43710 (36718,49893) | 1286.51 (1120.52,1438.08) | 887.22 (748.87,1011.01) |
| **Uzbekistan** | 1393  (1131,  1675) | 1751 (1335,2174) | 11.79 (9.48,14.21) | 6.36 (4.82,7.93) | 42212 (34300,50680) | 52060 (39763,65057) | 346.11 (280.25,415.77) | 173.13 (132.14,216) |
| **Vanuatu** | 9  (6,  13) | 18 (12,28) | 14.39 (9.97,22.07) | 10.98 (7.52,16.67) | 239 (161,363) | 506 (344,758) | 356.25 (243.61,545.12) | 270.36 (185.67,407.85) |
| **Yemen** | 784  (534,  1155) | 2006 (1270,2961) | 16.02 (10.98,23.46) | 15.09 (9.68,21.77) | 22985 (15413,33626) | 55328 (34339,82583) | 423.91 (287.3,621.43) | 365.46 (229.94,540.57) |
| **Zambia** | 283  (209,  373) | 588 (372,868) | 10.42 (7.64,13.72) | 9.04 (5.79,13.03) | 7853 (5750,10442) | 16723 (10498,25599) | 261.62 (192.35,346.29) | 223.69 (142.62,331.17) |
| **Zimbabwe** | 781  (575,  1016) | 1300 (950,1685) | 20.4 (15.17,26.54) | 19.89 (14.59,25.54) | 20593 (15083,27145) | 36978 (26354,48955) | 488.79 (358.64,638.39) | 493 (359.74,638.5) |
| ASMR, age-standardized mortality rate; UI, uncertainty interval; DALYs, disability-adjusted life years; ASDR, age-standardized disability-adjusted life year rate | | | | | | | | |
